# Supplementary material for: Role of RbBP5 and H3K4me3 in the vicinity of Snail transcription start site during epithelial-mesenchymal transition in prostate cancer cell
Source: PubMed Central journal article supplement (PMC5323174; doi:10.18632/oncotarget.11549), 2016-08-23
Supplement: oncotarget-07-65553-s001.pdf [file oncotarget-07-65553-s001.pdf]

# Role of RbBP5 and H3K4me3 in the vicinity of snail transcription start site during epithelial- mesenchymal- transition in prostate cancer cell

## SUPPLEMENTARY FIGURES AND TABLES

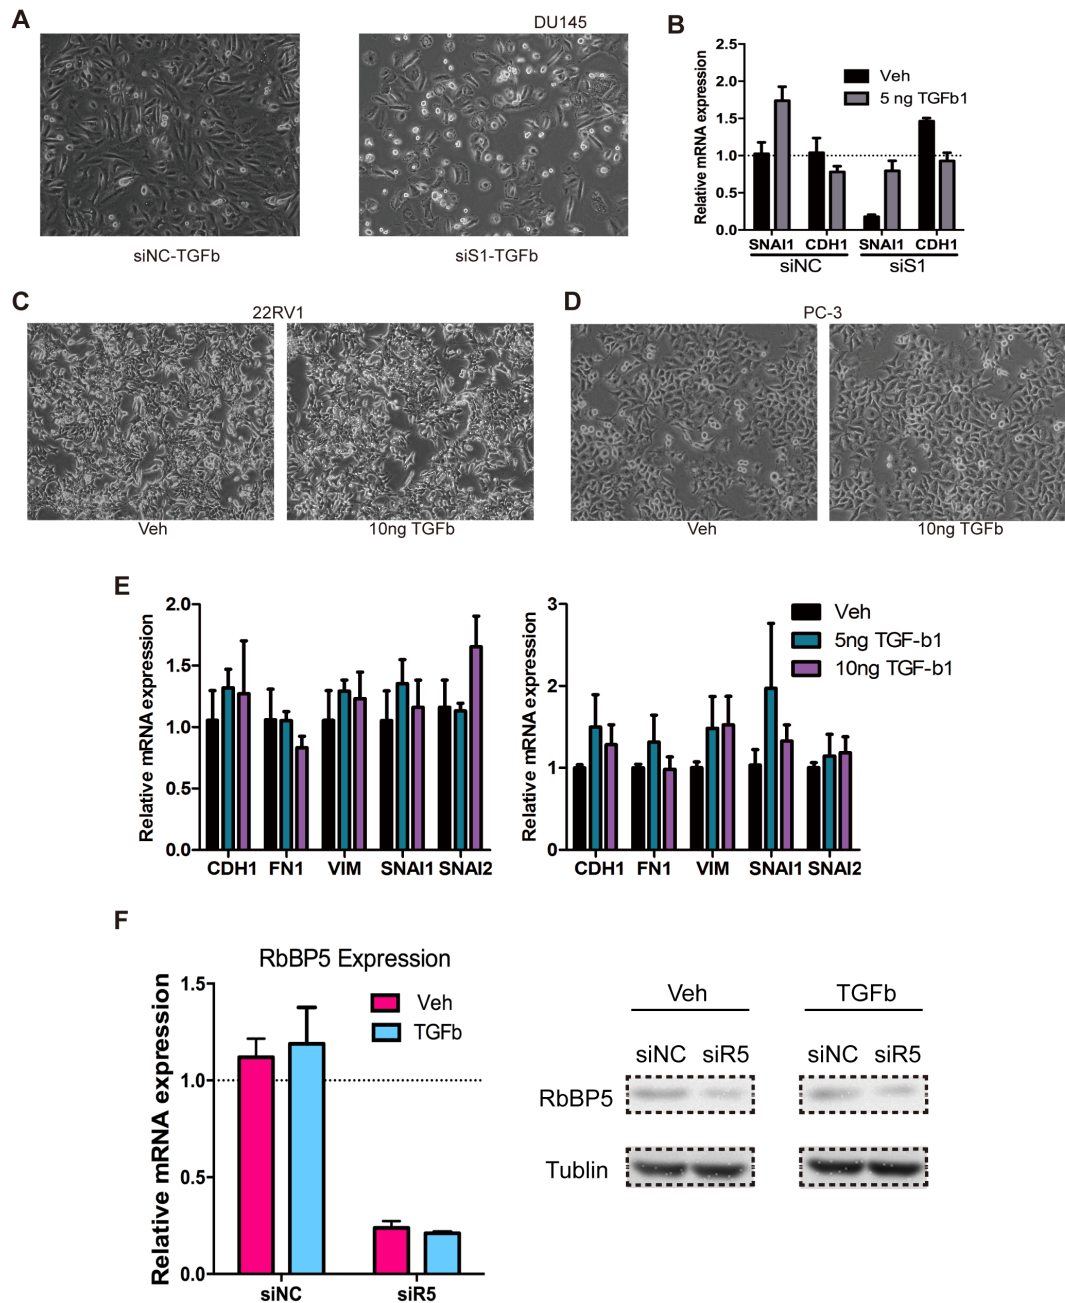

**Supplementary Figure S1:** A. Bright-phase microscopy: DU145 cells were serum-starved and stimulated with TGF-Beta1, after transfection of siSNAI1/siNC. B. SNAI1 and CDH1 mRNA expression of DU145 cells which were serum-starved and stimulated with TGF-Beta1 after transfection of siSNAI1/ siNC. C & D. Bright-phase microscopy: 22RV1 and PC-3 cells were serum-starved and stimulated with TGF-Beta1 or Veh (PBS) E. Expression of EMT molecular signatures: 22RV1 and PC-3 cells were serum-starved and stimulated with TGF-Beta1 or Veh (PBS) F. Knocking-down efficiency of RbBP5 at RNA and protein level w/o TGF-Beta1 incubation.

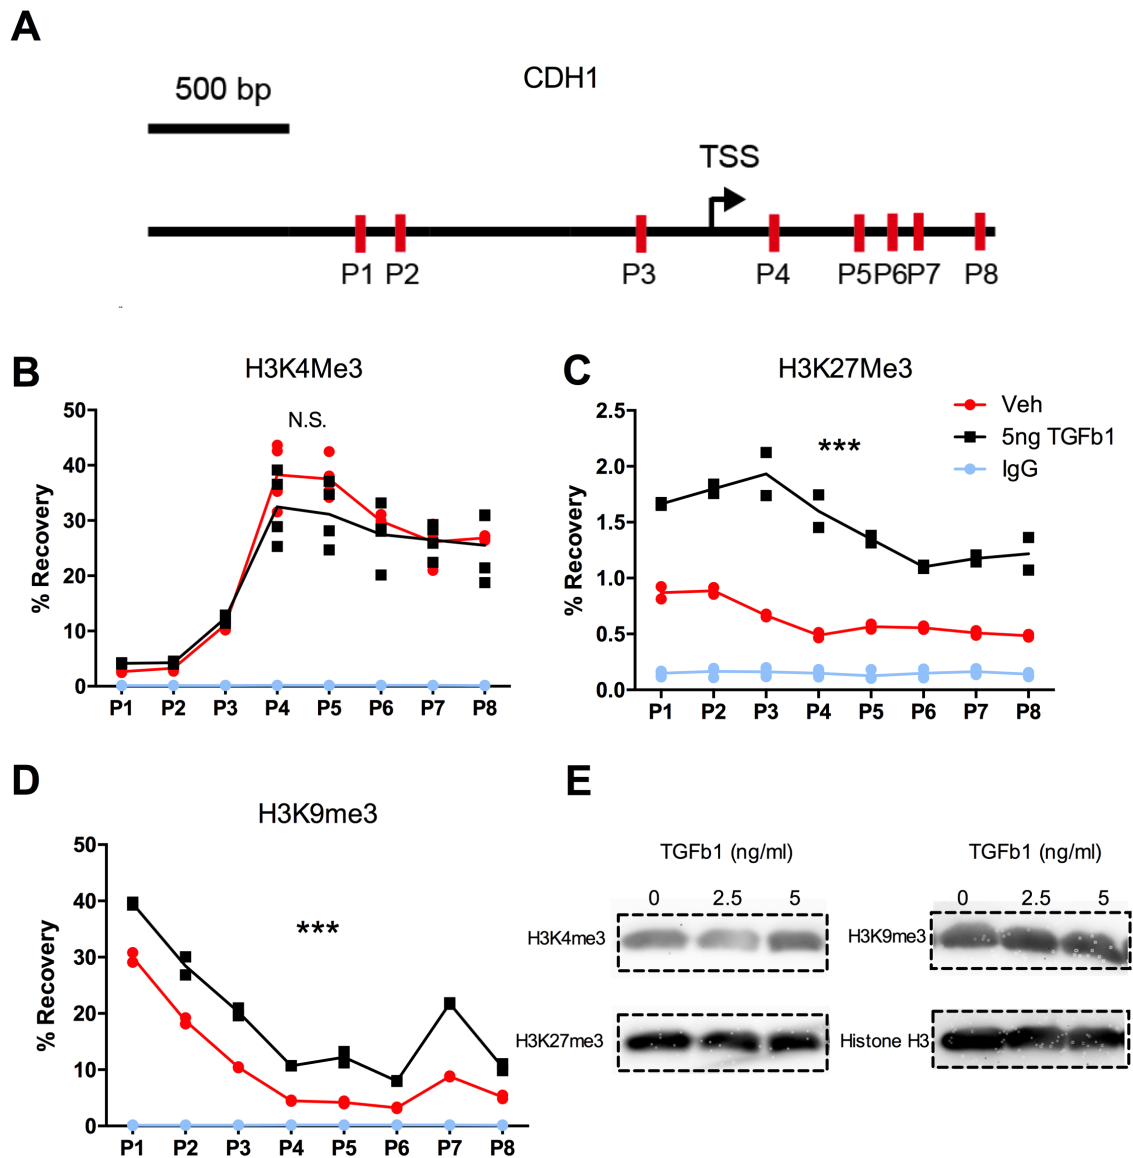

**Supplementary Figure S2: Changes in histone H3 modifications at the CDH1 TSS after TGF-Beta1 induction of EMT in DU145 cells.** **A.** Schematic depiction of the CDH1 promoter (-2k - +1k). Primer sets for ChIP amplicon analysis are indicated by the arrows in the schematic diagram (P1-P8). **B-D.** H3K4me3, H3K27me3 and H3K9me3 enrichment at corresponding sites (P1-P8) after 24 h of Veh/TGF-Beta1 treatment. **E.** Bulk level changes in H3K4me3, H3K27me3, H3K9me3 and total H3 in DU145 cells after 24 h of Veh/TGF-Beta1 treatment. (\*\*\*)  $p < 0.001$ ; 0.001 for P1-P8 amplicons.)

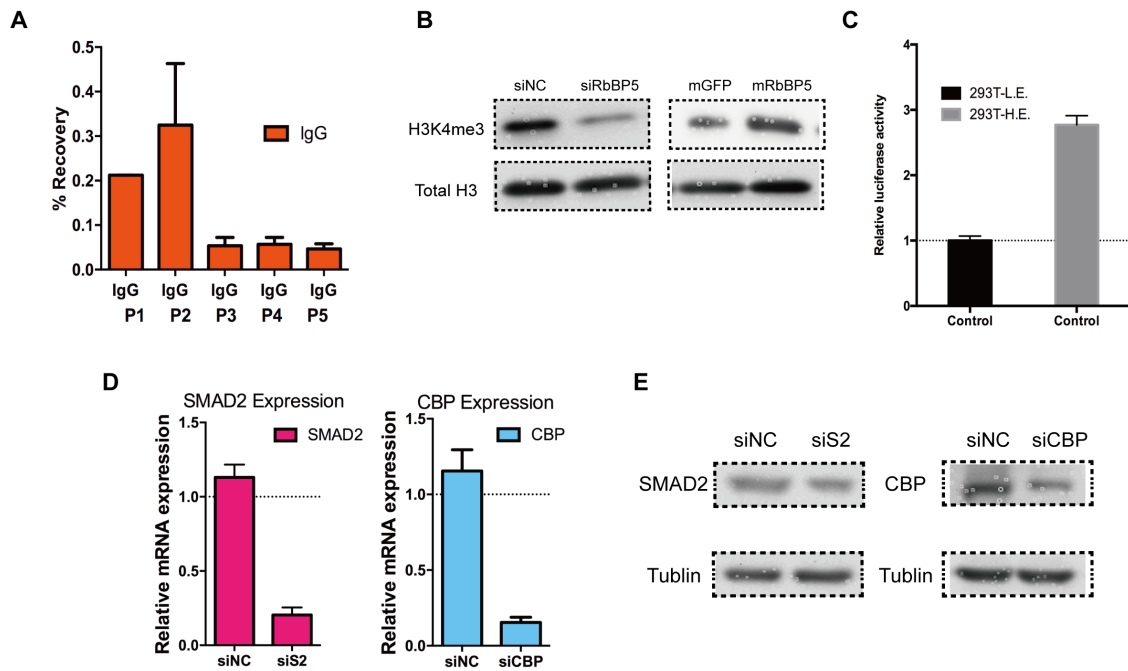

**Supplementary Figure S3: A.** Amplification results of isotype IgG in DU145 cells (ChIP). **B.** Bulk level modifications of H3K4me3, and total H3 in DU145 cells transiently transfected with siRbBP5/ siNC or mRbBP5/mGFP. **C.** Relative luciferase activity of HE/LE (293T-UAS-SNAI1p-Luc) cell lines **D.** Knocking-down efficiency of SMAD2 and CBP at RNA level. **E.** Knocking-down efficiency of SMAD2 and CBP at protein level.

Supplementary Table S1: Antibodies

| Antibody                                      | Catalog #             | Supplier                  | Application                         | Dilution            |
|-----------------------------------------------|-----------------------|---------------------------|-------------------------------------|---------------------|
| E-Cadherin                                    | #3195, rabbit mAb     | Cell Signaling Technology | Western blot                        | 1:1000              |
| E-Cadherin                                    | ab76055, mouse mAb    | Abcam                     | Immunofluorescence                  | 1:100               |
| Vimentin                                      | #5741, rabbit mAb     | Cell Signaling Technology | Western blot/<br>Immunofluorescence | 1:1000/ 1:100       |
| Snail                                         | #3879, rabbit mAb     | Cell Signaling Technology | Western blot                        | 1:1000              |
| Smad2/3                                       | #8685, rabbit mAb     | Cell Signaling Technology | Western blot/ Co-IP/<br>ChIP        | 1:1000/ 1:100/1:100 |
| p-SMAD2 (Ser465/467)                          | #3108, rabbit mAb     | Cell Signaling Technology | Western blot                        | 1:1000              |
| p-SMAD3 (Ser423/425)                          | #9520, rabbit mAb     | Cell Signaling Technology | Western blot                        | 1:1000              |
| SMAD2                                         | #5339, rabbit mAb     | Cell Signaling Technology | Western blot                        | 1:1000              |
| SMAD3                                         | #9523, rabbit mAb     | Cell Signaling Technology | Western blot                        | 1:1000              |
| WDR5                                          | #13105, rabbit mAb    | Cell Signaling Technology | Western blot/ ChIP                  | 1:1000/ 1:50        |
| RbBP5                                         | #13171, rabbit mAb    | Cell Signaling Technology | Western blot/ ChIP                  | 1:1000/ 1:50        |
| RNA Pol II CTD                                | #2926, rabbit mAb     | Cell Signaling Technology | Western blot/ ChIP                  | 1:1000/ 1:50        |
| H3K4me3                                       | ab8580, rabbit pAb    | Abcam                     | Western blot/ChIP                   | 1:1000/ 1:100       |
| H3K9me3                                       | ab8898, rabbit pAb    | Abcam                     | Western blot/ChIP                   | 1:1000/ 1:100       |
| H3K27me3                                      | ab8898, rabbit pAb    | Abcam                     | Western blot/ChIP                   | 1:1000/ 1:100       |
| Pan- H3Kac(acetyl K9 + K14 + K18 + K23 + K27) | ab47915, rabbit pAb   | Abcam                     | ChIP                                | 1:100               |
| CBP                                           | ab2832, rabbit pAb    | Abcam                     | Western blot/ Co-IP/<br>ChIP        | 1:1000/ 1:100/1:100 |
| TGF-Beta 1, 2, 3                              | MAB1835, mouse mAb    | R&D                       | Neutralization                      | up tp 2.5ug/ mL     |
| TGF-Beta 1                                    | MAB240, mouse mAb     | R&D                       | Neutralization                      | up to 2.5ug/ mL     |
| Beta- actin                                   | sc-47778, mouse mAb   | Santa Cruz                | Western blot                        | 1: 500              |
| Alpha- tublin                                 | 66031-1-Ig, mouse mAb | Protein tech.             | Western blot                        | 1: 500              |
| Alexa Fluor® 488 donkey anti-mouse            | A-21202               | Life Technologies         | Immunofluorescence                  | 1:500               |
| Alexa Fluor® 555 donkey anti-rabbit           | A-31572               | Life Technologies         | Immunofluorescence                  | 1:500               |
| Goat Anti-Rabbit IgG (H+L) HRP                | A16104                | Life Technologies         | Western blot                        | 1:2000              |
| Goat Anti-Mouse IgG (H+L) HRP                 | A16078                | Life Technologies         | Western blot                        | 1:2000              |
| Clean-Blot™ IP Detection Reagent (HRP)        | 21230                 | Thermo Fisher             | Western blot                        | 1:500               |

**Supplementary Table S2: Sequences of siRNAs**

| <b>Gene</b> | <b>Sequence(5'-3')</b>                                              |
|-------------|---------------------------------------------------------------------|
| siWDR5      | CGGUGUGUCUACAGCACUA                                                 |
| siRBBP5     | GGUGUCGGUAAUUCAGUUA                                                 |
| siSNAI1     | GGAAGCAGGAAGAGGAGAU                                                 |
| siCBP       | UGGAACAAGGUUCCCACUG                                                 |
| siSMAD2     | AACAGGCCUUUACAGCUUCUC                                               |
| siNC        | Due to the policy of Ribo Bio, the sequence cannot be display here. |

Supplementary Table S3: Primers for Constructions

| Construction description | Sequence(5'-3')                                                                  |
|--------------------------|----------------------------------------------------------------------------------|
| pCMV-Flag-WDR5 F         | GATCTCGAGCTCAAGCATGGATTACAAGGATGACGACGA<br>TAAGGCGACGGAGGAGAAG                   |
| pCMV-Flag-WDR5 R         | TGATTATGATCTAGA TTAGCAGTCACTCTTCCACAG                                            |
| pCMV-HA-RbBP5 F          | GATCTCGAGCTCAAGCATGTACCCATACGATGTTCCAGATT<br>ACGCTAACCTCGAGTTGCTGGA              |
| pCMV-HA-RbBP5 R          | TGATTATGATCTAGATCATAACAGTTCTGAGATTGC                                             |
| pGL4.35-SNAI1 F          | tctcgatctaagtaagctTCTCACCTCCTCATCAACTCT                                          |
| pGL4.35-SNAI1 R          | cagtaccggattgccaagctTGCAGCAGCGCCGCC                                              |
| HA-GAL4-DBD-Linker F     | GATCTCGAGCTCAAGCATGTACCCATACGATGTTCCAG<br>ATTACGCTAAGCTACTGTCTTCTATCGAACAAG      |
| GAL4-DBD-Linker R        | tggagagggagtaggtggtgacggaatcgcCGATACAGTCAACTGTCTTTGACCT                          |
| IVT-T7p-WDR5 F           | GCTAATACGACTCACTATAGGGCGCCACCATGGATTACAA<br>GGATGACGACGATAAGGCGACGGAGGAGAAG      |
| IVT-T7p-WDR5 R           | TGATTATGATCTAGATTAGCAGTCACTCTTCCACAG                                             |
| IVT-T7p-RbBP5 F          | GCTAATACGACTCACTATAGGGCGCCACCATGTACC<br>CATACGATGTTCCAGATTACGCTAACCTCGAGTTGCTGGA |
| IVT-T7p-RbBP5 R          | TGATTATGATCTAGATCATAACAGTTCTGAGATTGC                                             |

Supplementary Table S4: Primers for detection

| Gene            | Sequence(5'-3')         |
|-----------------|-------------------------|
| E-Cadherin F    | TACACTGCCAGGAGCCAGA     |
| E-Cadherin R    | TGGCACCAGTGTCCGGATTA    |
| Vimentin F      | TGAGTACCGGAGACAGGTGCAG  |
| Vimentin R      | TAGCAGCTTCAACGGCAAAGTTC |
| Snail F         | AGTTTACCTTCCAGCAGCCCTAC |
| Snail R         | GACAGAGTCCCAGATGAGCATT  |
| Fibronectin 1 F | CAGTGGGAGACCTCGAGAAG    |
| Fibronectin 1 R | TCCCTCGGAACATCAGAAAC    |
| WDR5 F          | CCGTTTGTGTCTTGGGAGTT    |
| WDR5 R          | CACTTGCCACAACCATTAC     |
| RBBP5 F         | CATCTTTGATAGCGAGGGG     |
| RBBP5 R         | GTTCCAGTTGTCCTCTGAAGG   |
| EpCAM F         | CTGGCCGTAACCTGCTTTGT    |
| EpCAM R         | AGCCATTCATTCTGCCTTC     |
| GAPDH F         | ACCCAGAAGACTGTGGATGG    |
| GAPDH R         | CAGTGAGCTTCCCGTTCAG     |
| TGFBR1 F        | GCTGTATTGCAGACTTAGGACTG |
| TGFBR1 R        | TTTTTGTTCCTACTCTGTGGTT  |
| TGFBR2 F        | GTAGCTCTGATGAGTGAATGAC  |
| TGFBR2 R        | CAGATATGGCAACTCCCAGTG   |
| TGFB1 F         | CAATTCCTGGCGATACCTCAG   |
| TGFB1 R         | GCACAACCTCCGGTGACATCAA  |
| TGFB2 F         | CAGCACACTCGATATGGACCA   |
| TGFB2 R         | CCTCGGGCTCAGGATAGTCT    |
| TGFB3 F         | ACTTGCACCACCTTGGACTTC   |
| TGFB3 R         | GGTCATCACCGTTGGCTCA     |
| ChIP Primers    |                         |
| SNAI1 P1 F      | TAAATTGACACGGGACGGGG    |
| SNAI1 P1 R      | CTGGTTCTAGCTGGAGAGCG    |
| SNAI1 P2 F      | GAACGGTGAGACCTGTGAGG    |
| SNAI1 P2 R      | GTAACACGGCTCCATAGGGG    |
| SNAI1 P3 F      | TACTTAAGGGAGTTGGCGGC    |
| SNAI1 P3 R      | CGCAGAAGAACCCTCGCTA     |
| SNAI1 P4 F      | GAACGGTGAGACCTGTGAGG    |
| SNAI1 P4 R      | GTAACACGGCTCCATAGGGG    |
| SNAI1 P5 F      | GGAACCTGGTCTGTCTGTG     |
| SNAI1 P5 R      | CAACAAACATGAGCCACCG     |
| CDH1 P1 F       | CCACAACAGCATAGGGAGACA   |
| CDH1 P1 R       | CTAGGTCAGGACCACCTCCC    |
| CDH1 P2 F       | TTCCATTAGGAGGGTGGAGA    |
| CDH1 P2 R       | TTCATGGGTTAGTGAGTCAGC   |
| CDH1 P3 F       | CAGTGGAATCAGAACCGTGC    |
| CDH1 P3 R       | CTCGCATAGACGCGGTGA      |
| CDH1 P4 F       | GGATCCCCTGACTTGCAGGG    |
| CDH1 P4 R       | GCTCCTCAGGACCCGAACCTT   |
| CDH1 P5 F       | GCCATGCCAAGAAAGGTCTGT   |
| CDH1 P5 R       | CCACTTTCCTTAGACCGGGA    |
| CDH1 P6 F       | GCTCTGAGGAGTGGTGCATT    |
| CDH1 P6 R       | CAAGACCTAGCCCACCGTTC    |
| CDH1 P7 F       | AGACTGAAAGGGAACGGTGG    |
| CDH1 P7 R       | CCCACCCGAAACCTACG       |
| CDH1 P8 F       | CTGGGGTCTCCCCAAT        |
| CDH1 P8 R       | GGTAGATGGAACCGGGTGAC    |
